# Supplementary material
Source: PubMed Central journal article supplement (PMC3709448)
Supplement: NIHMS483043-supplement-01.pdf [file NIHMS483043-supplement-01.pdf]

## **Supplemental Information**

### **Dscam Expression Levels Determine Presynaptic Arbor Sizes in *Drosophila* Sensory**

### **Neurons**

Jung Hwan Kim, Xin Wang, Rosemary Coolon and Bing Ye

## **Inventory of Supplemental Information**

### **Supplemental Data**

Figure S1.  
related to Figure 1 and Figure 3.

Figure S2.  
related to Figure 2.

Figure S3.  
related to Figure 3.

Figure S4.  
related to Figure 6.

Figure S5.  
related to Figure 7.

## **Supplemental Figure Legends**

## **Supplemental References**

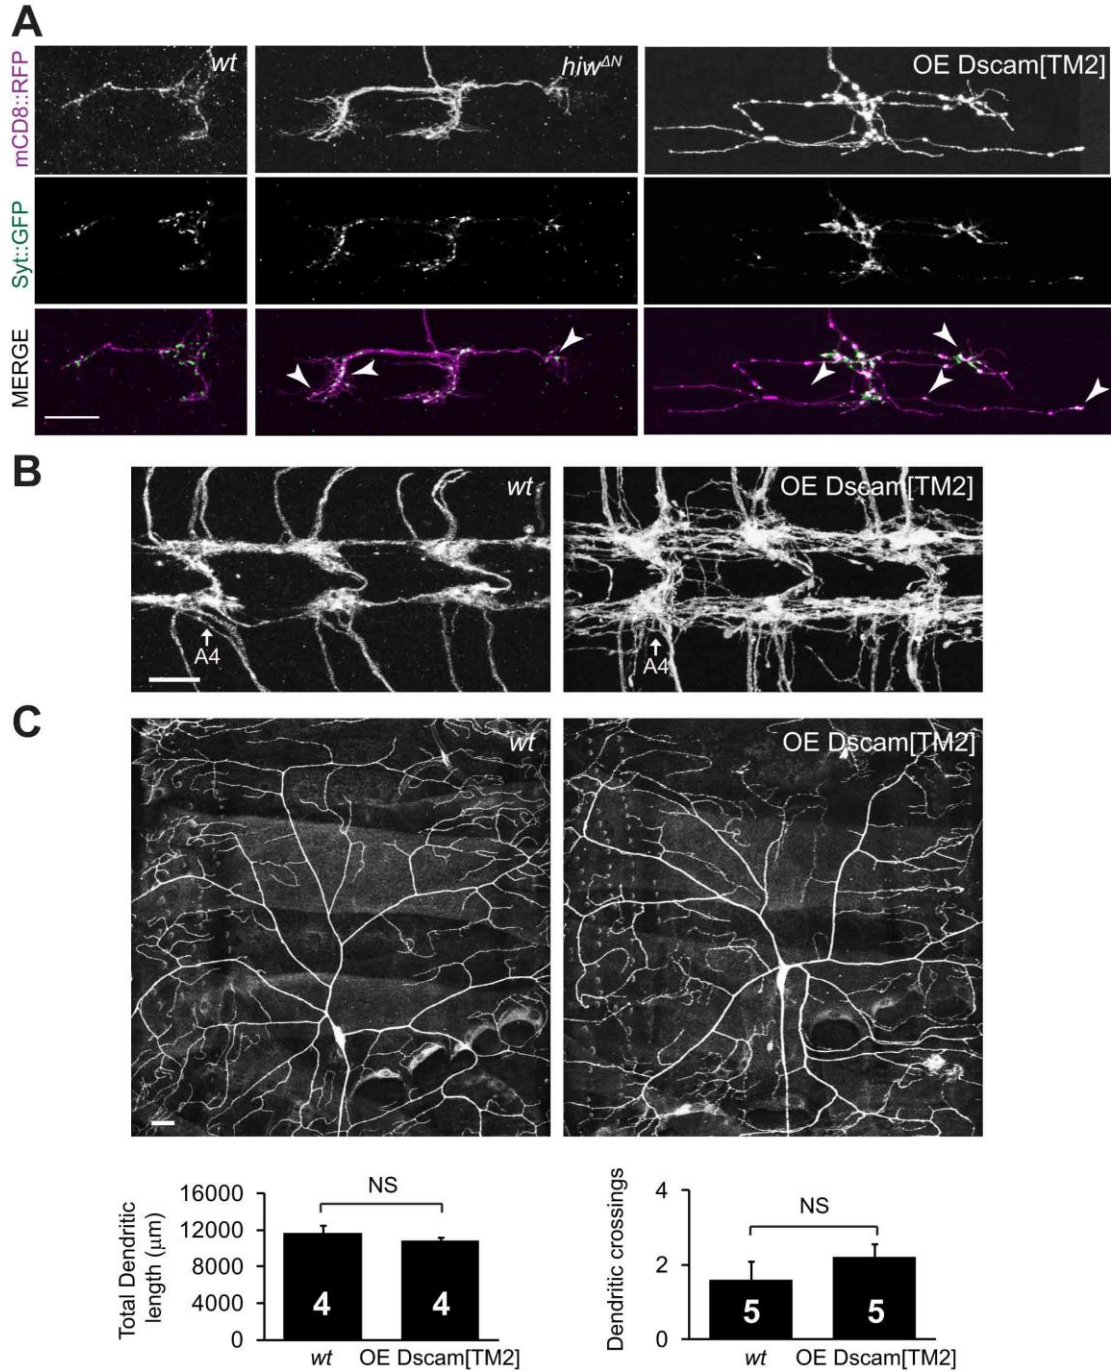

**Figure S1. *Hiw* and *Dscam* regulate presynaptic arbor growth in C4da neurons. (Related to Figure 1 and Figure 3)**

(A) Presynaptic arbors of single ddaC neurons labeled with the presynaptic marker synaptotagmin::GFP (*Syt::GFP*). The flip-out technique, which employs an excisable GAL80 (Gordon and Scott, 2009), was used to express the membrane marker *mCD8::mRFP* (magenta) and the presynaptic marker *Syt::GFP* (green) in *wild-type* (*wt*), *hiw* mutant (*hiw<sup>AN</sup>*), and *Dscam*[TM2]-overexpressing C4da neurons (OE *Dscam*[TM2]). Arrowheads point to ectopic synaptic regions formed in overgrown axon terminals. Scale bar: 10  $\mu\text{m}$ . (B-C) Overexpression

of *Dscam*[TM2] does not change dendritic growth in C4da neurons. A *Dscam*[TM2] transgene was expressed using the *ppk-Gal4* driver. Axonal (B) and dendritic arbors (C) were visualized with mCD8::GFP. Quantification of total dendritic length and dendritic crossings are shown in the bottom panels. Scale bar: 10  $\mu$ m. Sample numbers are shown in the bars.

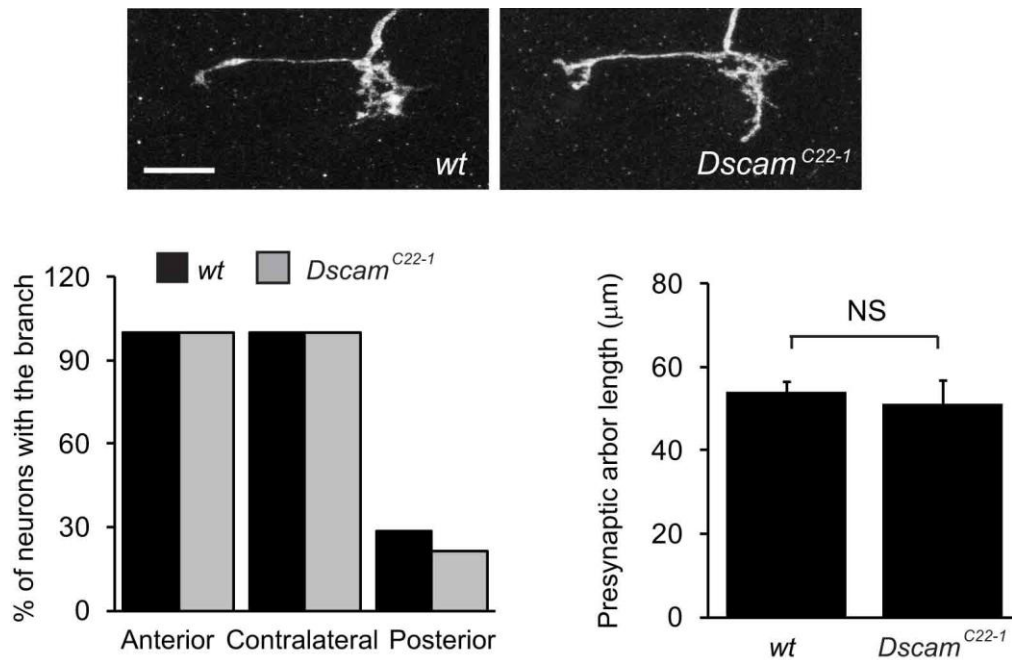

**Figure S2. Reducing the diversity of Dscam ectodomain does not affect either the targeting or the growth of C4da presynaptic arbors. (Related to Figure 2)**

Representative images and quantification of single C4da neuron presynaptic arbors that are *wild-type* (*wt*), or homozygous for a *Dscam* allele with reduced diversity (*Dscam<sup>C22-1</sup>*). *Dscam<sup>C22-1</sup>* contains a partial deletion of the exon 4 cluster, resulting in 75% reduction of alternative exon 4 (Wang et al., 2004). Scale bar: 10 μm. *wt*, n = 14; *Dscam<sup>C22-1</sup>*, n = 14.

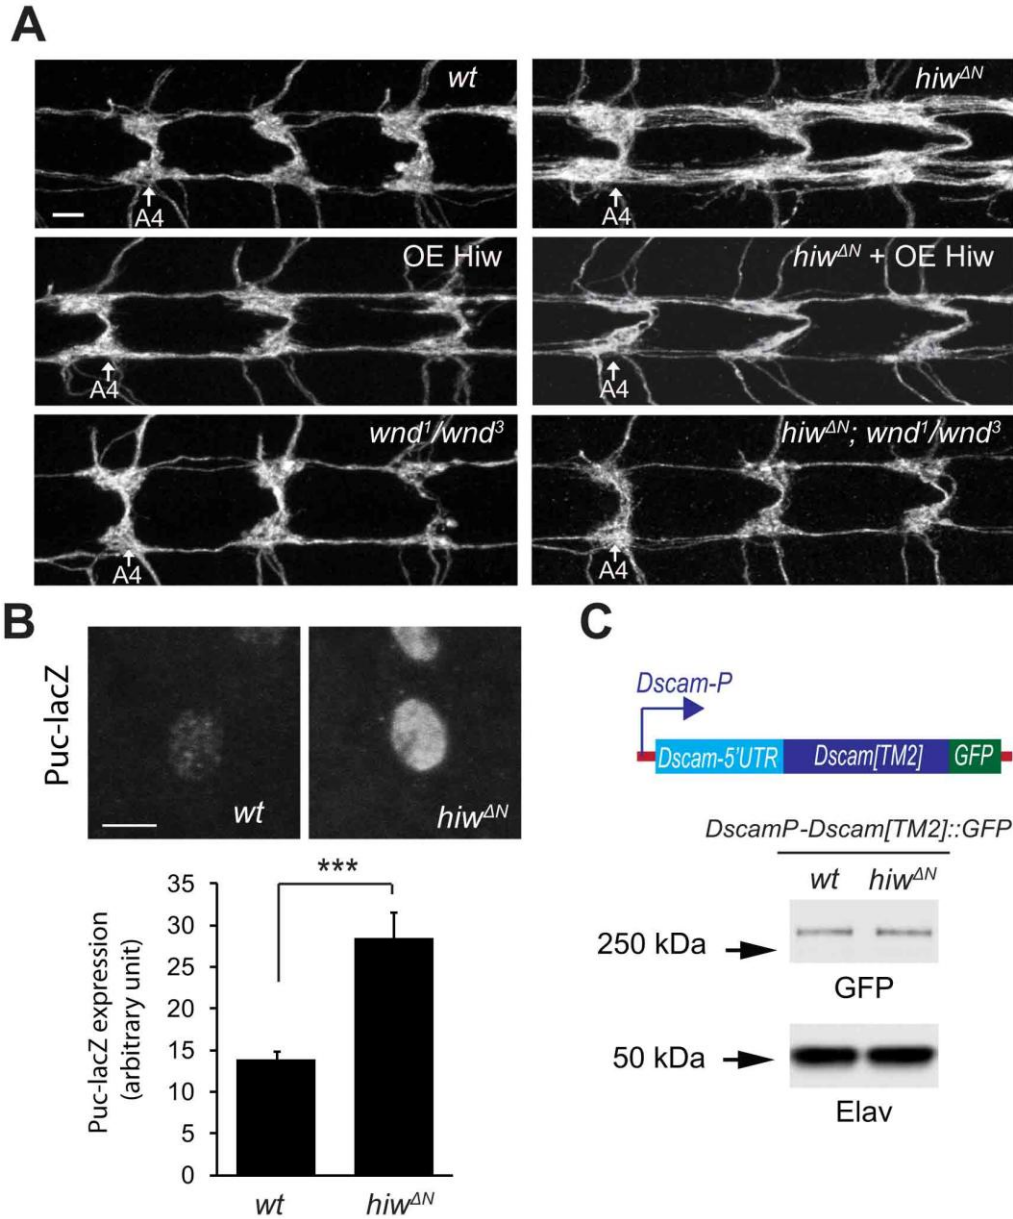

activity. *Dscam*[TM2]::GFP is expressed under the control of the *Dscam* promoter (*Dscam-P*) and *Dscam* 5'UTR in *wt* and *hiw*<sup>ΔN</sup> larvae. *Dscam*[TM2]::GFP expression in larval brains was examined by Western blot analysis using an anti-GFP antibody and normalized to Elav (wild-type:  $1.00 \pm 0.08$ , n = 3; *hiw*<sup>ΔN</sup>:  $1.21 \pm 0.14$ , n = 3; mean  $\pm$  SEM; p = 0.18, paired t-test).

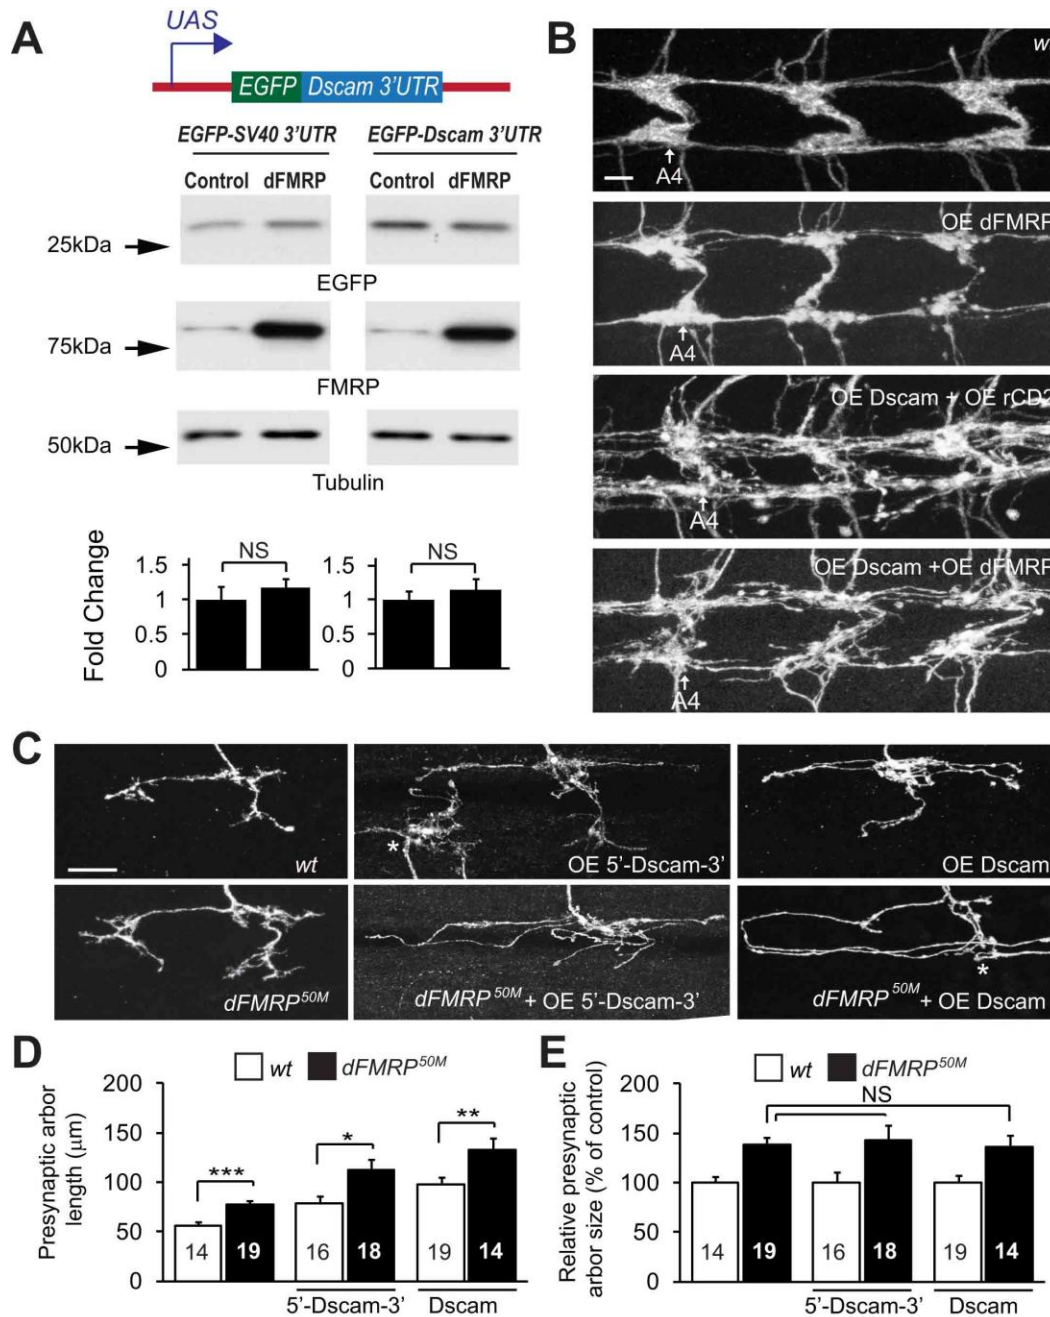

**Figure S4. FMRP regulates *Dscam* expression through the coding region of *Dscam* mRNA. (Related to Figure 6)**

(A) FMRP does not regulate *Dscam* expression through the *Dscam* 3'UTR. Western blots of lysates of cultured S2 cells expressing EGFP reporters SV40 3'UTR or *Dscam* 3'UTR along with dFMRP cDNA (dFMRP) or an empty vector (Control). Bar chart: quantification of the expression levels of EGFP reporter. EGFP expression levels were normalized to tubulin levels and presented as fold change for statistical analysis (n = 4). (B) FMRP is sufficient to suppress presynaptic arbor overgrowth caused by *Dscam*-overexpression. Shown are presynaptic arbors of larval C4da neurons labeled with *ppk*-CD4::tdTomato in C4da neurons that are *wild-type* (*wt*),

overexpressing dFMRP (OE dFMRP), overexpressing a *Dscam* transgene that does not contain *Dscam* 5' and 3'UTRs along with the membrane protein rat CD2 (OE Dscam + OE rCD2), and overexpressing the same *Dscam* transgene along with dFMRP (OE Dscam + OE dFMRP). C4da presynaptic arbors in abdominal segments 4 (A4) through 6 are shown. Scale bar: 5  $\mu$ m. (C) FMRP is required to restrain presynaptic arbor overgrowth caused by *Dscam*-overexpression. Shown are presynaptic arbors of single ddaC MARCM clones. To avoid possible saturation of presynaptic arbor growth by *Dscam*-overexpression, we chose UAS-*Dscam* and UAS-5'-*Dscam*-3' transgenes that express *Dscam* at a lower level than those used in Figure 1B and 2D. These two transgenes are located in the same genomic locus. Scale bar: 5  $\mu$ m. (D) Quantification of presynaptic arbor length. Sample numbers are shown in the bars. (E) Quantification of relative presynaptic arbor size. Relative presynaptic arbor sizes were obtained by normalizing values from *dFMRP* mutant clones to the average values of corresponding of wild-type clones (*dFMRP*<sup>50M</sup> vs *wt*; *dFMRP*<sup>50M</sup> + OE 5'-*Dscam*-3' vs OE 5'-*Dscam*-3'; *dFMRP*<sup>50M</sup> + OE *Dscam* vs OE *Dscam*). Sample numbers are shown in the bars.



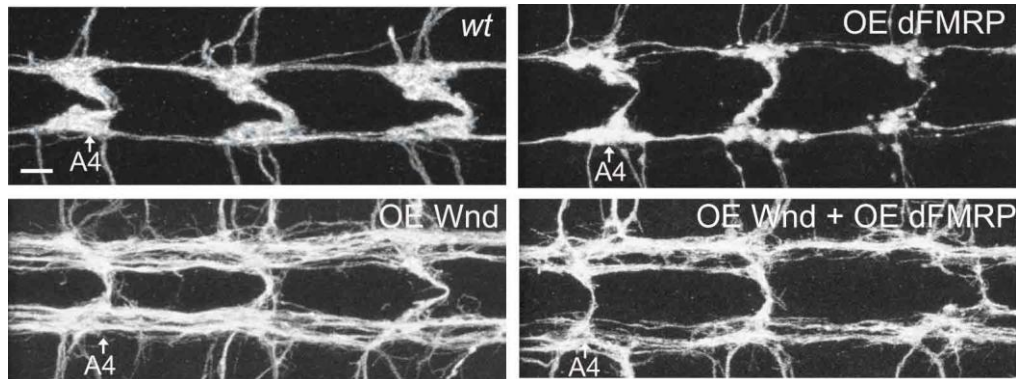

**Figure S5. Wnd and FMRP converge to regulate presynaptic arbor growth. (Related to Figure 7)**

Wnd was expressed using the driver *ppk-Gal4* with either the control transgene *rCD2* (OE Wnd) or *dFMRP* (OE Wnd + OE *dFMRP*). Note that *dFMRP* suppresses extensive overgrowth of C4da presynaptic arbors caused by Wnd overexpression (OE Wnd). C4da presynaptic arbors in abdominal segments 4 (A4) through 6 are shown. Scale bar: 5  $\mu$ m.

### **Supplemental References**

Gordon, M.D., and Scott, K. (2009). Motor Control in a *Drosophila* Taste Circuit. *Neuron* *61*, 373-384.

Xiong, X., Wang, X., Ewanek, R., Bhat, P., Diantonio, A., and Collins, C.A. (2010). Protein turnover of the Wallenda/DLK kinase regulates a retrograde response to axonal injury. *J. Cell Biol.* *191*, 211-223.

Wang, J., Ma, X., Yang, J.S., Zheng, X., Zugates, C.T., Lee, C.H., and Lee, T. (2004). Transmembrane/juxtamembrane domain-dependent Dscam distribution and function during mushroom body neuronal morphogenesis. *Neuron* *43*, 663-672.

Zhan, X.L., Clemens, J.C., Neves, G., Hattori, D., Flanagan, J.J., Hummel, T., Vasconcelos, M.L., Chess, A., and Zipursky, S.L. (2004). Analysis of Dscam diversity in regulating axon guidance in *Drosophila* mushroom bodies. *Neuron* *43*, 673-686.
